# Supplementary material for: Machine Learning in Antibody Diagnostics for Inflammatory Bowel Disease Subtype Classification
Source: MDPI journal article supplement (doi:10.3390/diagnostics13152491), 2023-07-26
Supplement: s1 [file s1]

**Supplementary Table S1. Clinical characteristics of adult CD and UC patients**

|                                                                      | CD                  | UC               |
|----------------------------------------------------------------------|---------------------|------------------|
| number of patients                                                   | 50                  | 50               |
| males, n (%)                                                         | 26 (52)             | 29 (58)          |
| age at diagnosis, median (IQR), y                                    | 24 (19-34.5)        | 34.5 (27.8-48.8) |
| age at serum sampling, median (IQR), y                               | 34.9 (24.2-52)      | 44.5 (36.8-38.3) |
| disease duration at serum sampling, median (IQR), y                  | 6.6 (3.8-12.8)      | 6.2 (2.8-12.7)   |
| years of follow-up, median (IQR), y                                  | 12.3 (6.4-19)       | 12.2 (7.6-20.4)  |
| need of surgery, n (%)                                               | 12 (24.0)           | 4 (8.0)          |
| treated with biologicals, n (%)                                      | 43 (86.0)           | 16 (32.0)        |
| <b>disease location at diagnosis and last follow-up in CD, n (%)</b> | <b>diagnosis</b>    | <b>follow-up</b> |
| L1: ileal                                                            | 10 (20)             | 11 (22)          |
| L2: colonic                                                          | 10 (20)             | 13 (26)          |
| L3: ileocolonic                                                      | 21 (42)             | 18 (36)          |
| L4: upper GI disease                                                 | 0 (0)               | 2 (4)            |
| L1 and L4                                                            | 0 (0)               | 1 (2)            |
| L3 and L4                                                            | 4 (8)               | 3 (6)            |
| unknown                                                              | 5 (10)              | 2 (4)            |
| <b>disease location in UC, n (%)</b>                                 | <b>at diagnosis</b> | <b>follow-up</b> |
| E1: proctitis                                                        | 10 (20)             | 5 (10)           |
| E2: left-sided colitis                                               | 18 (36)             | 21 (42)          |
| E3: extensive (pancolitis)                                           | 15 (30)             | 23 (46)          |
| unknown                                                              | 7 (14)              | 1 (2)            |

**CD: Crohn's Disease, UC: Ulcerative colitis, IQR: interquartile range, y: years**

**Supplementary Table S2. antibody status of CD vs. UC patients**

|                                       | IBD        | CD             | UC            | p-value* |
|---------------------------------------|------------|----------------|---------------|----------|
| number of patients                    | 100        | 50             | 50            |          |
| <b>ANCA</b>                           |            |                |               |          |
| cANCA positivity, n (%)               | 4 (4.0)    | 2 (4.0)        | 2 (4.0)       | >0.9     |
| (atypical) pANCA positivity, n (%)    | 10 (10.0)  | 6 (12.0)       | 4 (8.0)       | 0.741    |
| xANCA positivity, n (%)               | 31 (31.0)  | 6 (12.0)       | 25 (50.0)     | <0.001   |
| PR3-ANCA positivity, n (%)            | 14 (14.0)  | 2 (4.0)        | 12 (24.0)     | 0.008    |
| PR3-ANCA U/ml, median (IQR)           | 0 (0)      | 0 (0)          | 0.8 (0-5.1)   | <0.001   |
| MPO-ANCA positivity, n (%)            | 0 (0)      | 0 (0)          | 0 (0)         | n.a.     |
| <b>ASCA</b>                           |            |                |               |          |
| IgA positivity, n (%)                 | 40 (40.0)  | 32 (64.0)      | 8 (16.0)      | <0.001   |
| IgA U/ml, median (IQR)                | 4 (1.6-15) | 9.5 (2.8-83.5) | 2.2 (1.5-4.6) | <0.001   |
| IgG positivity, n (%)                 | 23 (23.0)  | 22 (44.0)      | 1 (2.0)       | <0.001   |
| IgG U/ml, median (IQR)                | 2 (0.7-7)  | 5.5 (1.5-43.5) | 1 (0.6-2.6)   | <0.001   |
| <b>Antibody Combinations (n (%))</b>  |            |                |               |          |
| xANCA neg, PR3-ANCA neg, all ASCA neg | 32 (32.0)  | 13 (26.0)      | 19 (38.0)     | 0.284    |
| xANCA pos, PR3-ANCA pos               | 9 (9.0)    | 1 (2.0)        | 8 (16.0)      | 0.031    |
| xANCA neg, all ASCA neg               | 35 (35.0)  | 13 (26.0)      | 22 (44.0)     | 0.093    |
| xANCA neg, any ASCA pos               | 34 (34.0)  | 31 (62.0)      | 3 (6.0)       | <0.001   |
| xANCA pos, all ASCA neg               | 23 (23.0)  | 3 (6.0)        | 20 (40.0)     | <0.001   |
| xANCA pos, any ASCA pos               | 8 (8.0)    | 3 (6.0)        | 5 (10.0)      | 0.715    |
| PR3-ANCA neg, all ASCA neg            | 49 (49.0)  | 16 (32.0)      | 33 (66.0)     | 0.001    |
| PR3-ANCA neg, any ASCA pos            | 37 (37.0)  | 32 (64.0)      | 5 (10.0)      | <0.001   |
| PR3-ANCA pos, all ASCA neg            | 9 (9.0)    | 0 (0)          | 9 (18.0)      | 0.003    |
| PR3-ANCA pos, any ASCA pos            | 5 (5.0)    | 2 (4.0)        | 3 (6.0)       | >0.9     |

\*Pearson's Chi-squared test, Fisher's exact test, Wilcoxon rank sum test with correction for multiple testing  
 IBD, inflammatory bowel disease; CD, Crohn's disease; UC, ulcerative colitis; ANCA, Anti-Neutrophil cytoplasmic antibodies; ASCA, anti-*S. cerevisiae* antibodies; IQR, inter quartile range

## Supplementary Figure

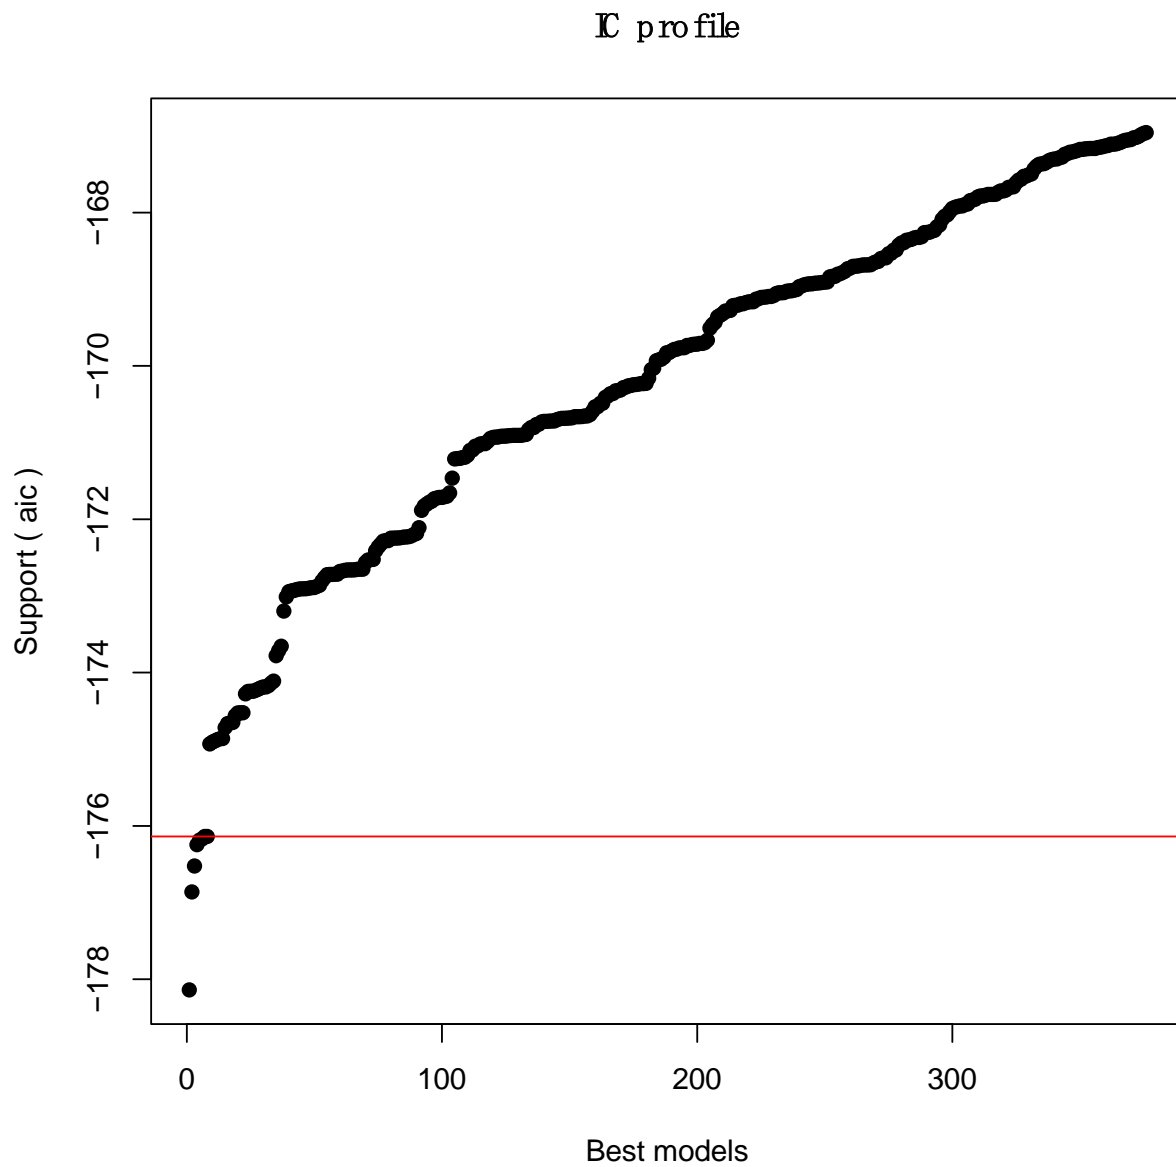

**Supplementary Figure S1.** Akaike Information Criterion (AIC) profile plot. The horizontal line delineates models that are less than 2 AIC units away from the best model (on the very left). In total, 376 model combinations were assessed.

**Figure S2 A,B:**

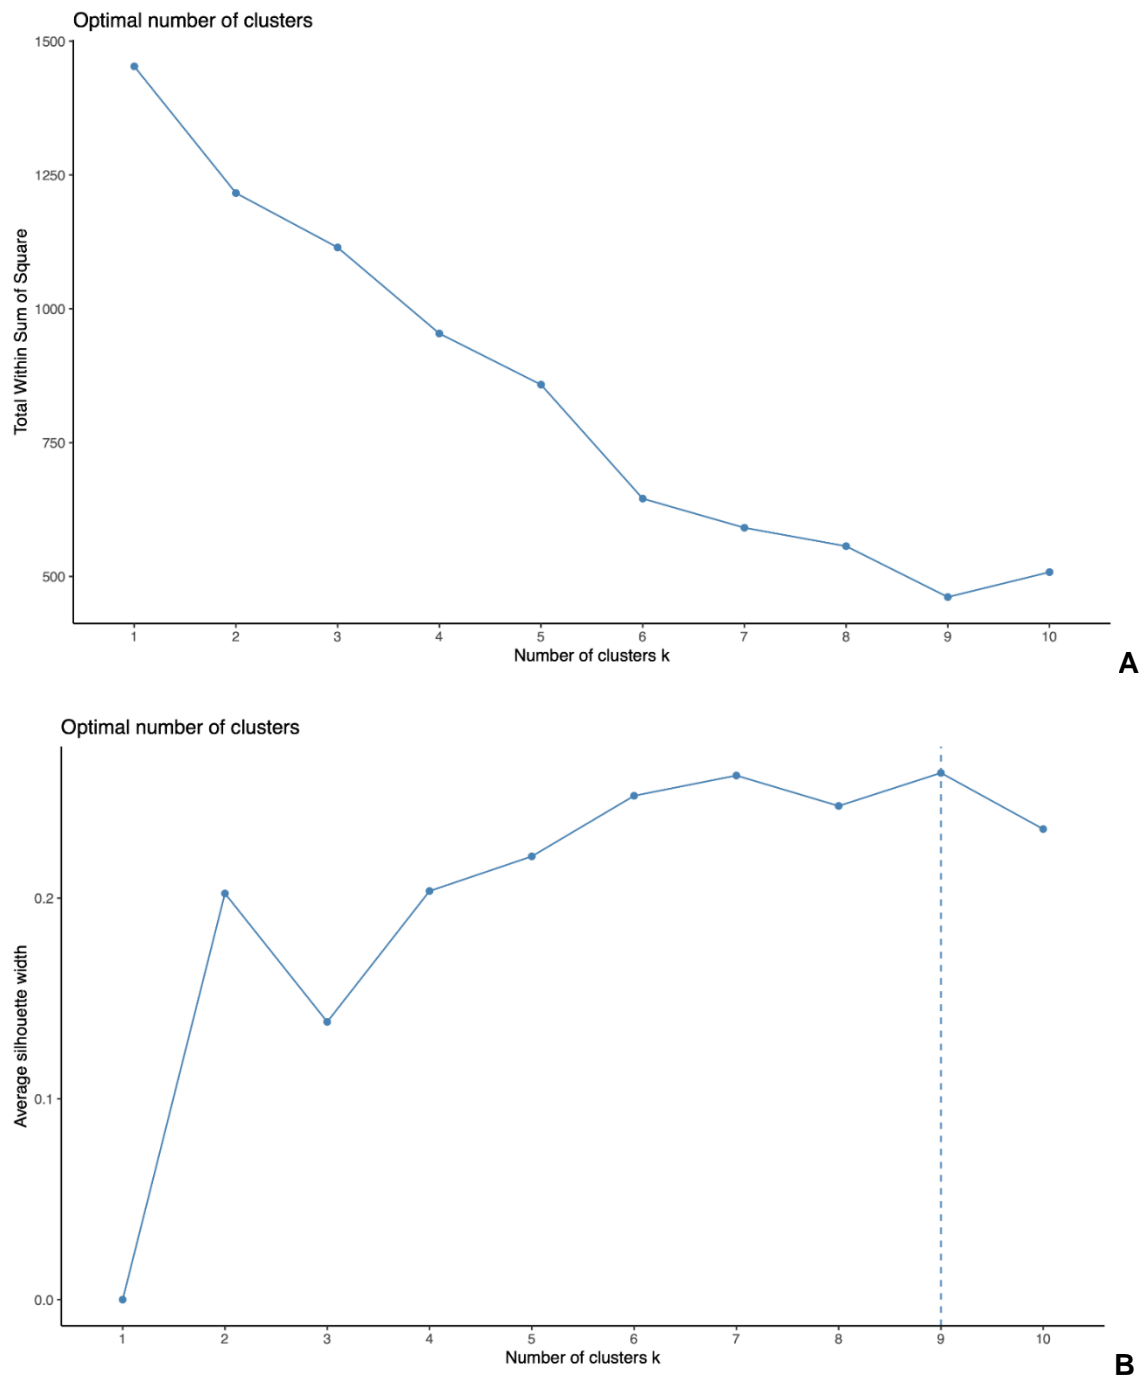

**Supplementary Figure S2.** Visualization of the number of clusters suggested by the data. Both plots indicate that the true underlying number of clusters is more likely to be two than three. The optimal number of clusters found with this method is nine - though this is clinically not applicable.
